# Supplementary material
Source: PubMed Central journal article supplement (PMC4239170)
Supplement: NIHMS631864-supplement-Supplemental_Material_2.pdf [file NIHMS631864-supplement-Supplemental_Material_2.pdf]

**SUPPLEMENTAL MATERIAL**

**Supplemental Figures**

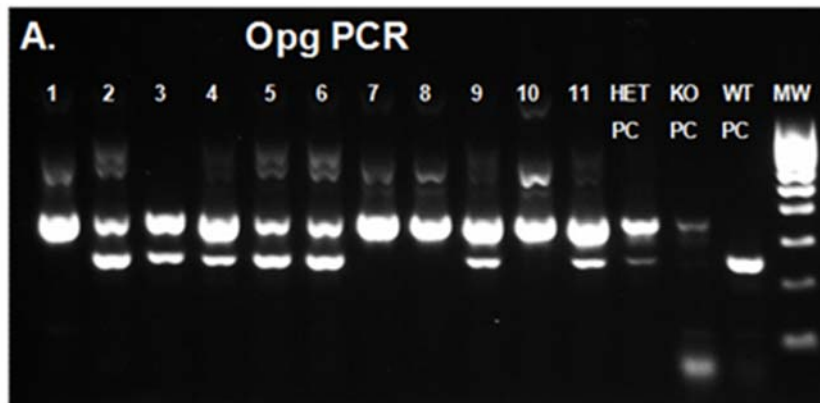

|                 | Opg(+/+)  | Opg(+/-)  | Opg(-/-)  |
|-----------------|-----------|-----------|-----------|
| WT allele       | + (250bp) | + (250bp) | -         |
| Opg null allele | -         | + (366bp) | + (366bp) |

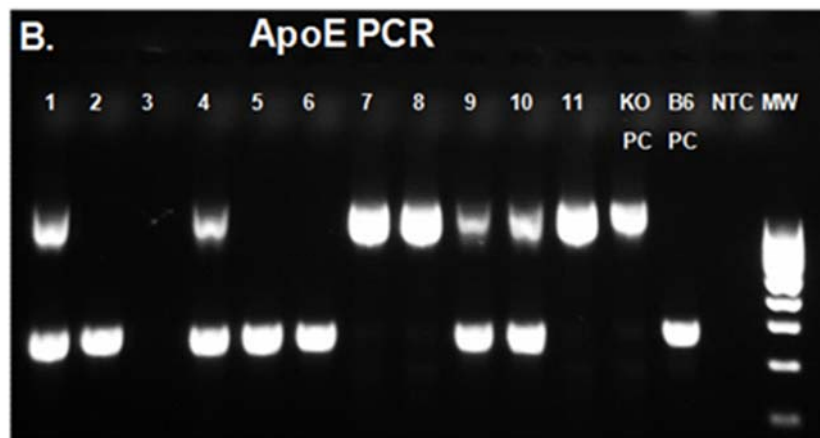

|                 | ApoE(+/+) | ApoE(+/-) | ApoE(-/-) |
|-----------------|-----------|-----------|-----------|
| WT allele       | + (300bp) | + (300bp) | -         |
| ApoEnull allele | -         | + (1.2Kb) | + (1.2Kb) |

Note: 7 and 8 are ApoE.OPG double knockouts

**Figure I: Homozygous null mutations for osteoprotegerin ( $Opg^{-/-}$ ) generated in apolipoprotein E-deficient C57Bl/6 ( $ApoE^{-/-}$ ) mice.** Representative agarose gel electrophoretic profiles of PCR-amplified products of *Opg* (A) and *ApoE* (B) PCR. PC, positive control; NTC, no template control; WT, wild-type; KO, knock-out; MW, molecular weight ladder (100bp).

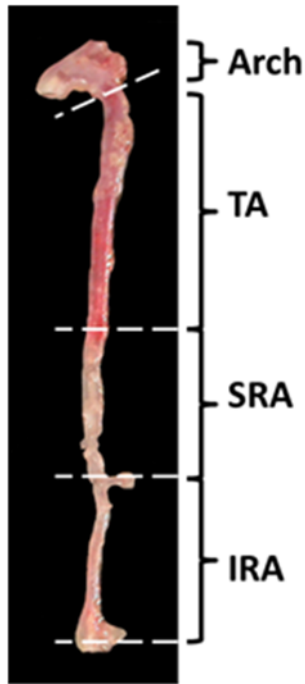

**Figure II: Aortic region boundaries.** *Aortic arch*: from heart to left subclavian artery; *thoracic aorta* (TA): from left subclavian artery to the aortic hiatus in the diaphragm; *suprarenal aorta* (SRA): from the aortic hiatus to the left renal artery; *infrarenal aorta* (IRA): from left renal artery to the aortic bifurcation at the left and right common iliac arteries.

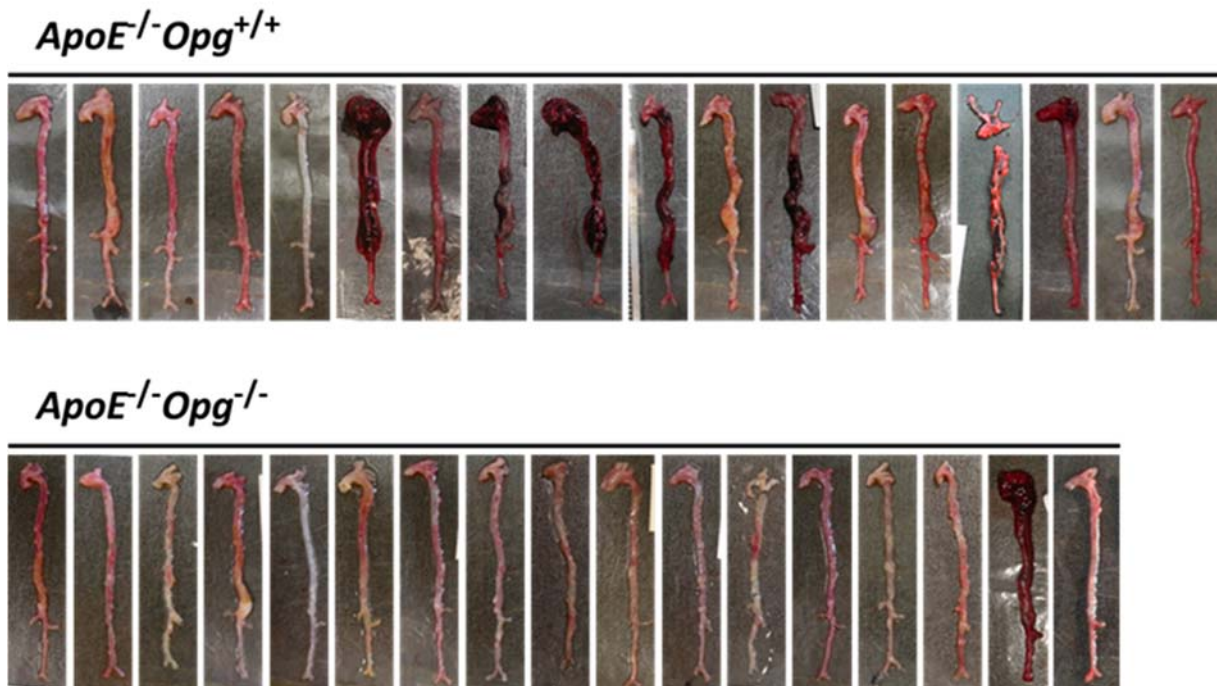

**Figure III: Effect of *Opg* deficiency on AngII-induced aortic dilatation in *ApoE*<sup>-/-</sup> mice.** Gross morphology of aortas harvested from *ApoE*<sup>-/-</sup>*Opg*<sup>+/+</sup> (control) and *ApoE*<sup>-/-</sup>*OPG*<sup>-/-</sup> mice subcutaneously infused with AngII (1.0 µg/kg/min) for 28 days.

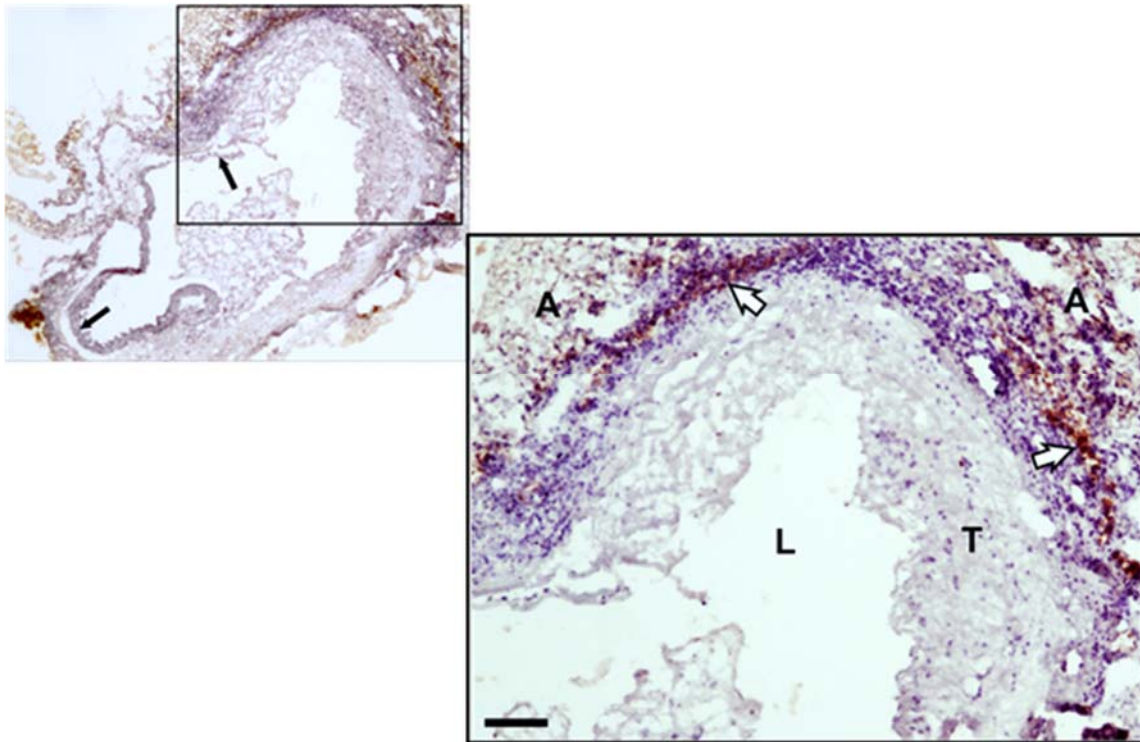

**Figure IV: Immuno-detection of monocyte/macrophages within *ApoE*<sup>-/-</sup>*Opg*<sup>-/-</sup> aorta.** Immunohistochemical localisation of MOMA-2 (brown stain) identifying monocyte/macrophages (white arrows) within the adventitia of 5µm frozen-sectioned SRA from an *Opg*-deficient *ApoE*<sup>-/-</sup> mouse infused with AngII over 28 days. **A**, adventitia; **L**, lumen; **T**, intramural thrombus; **black arrows** indicating elastic lamellae (media); Scale bar = 0.1 mm.

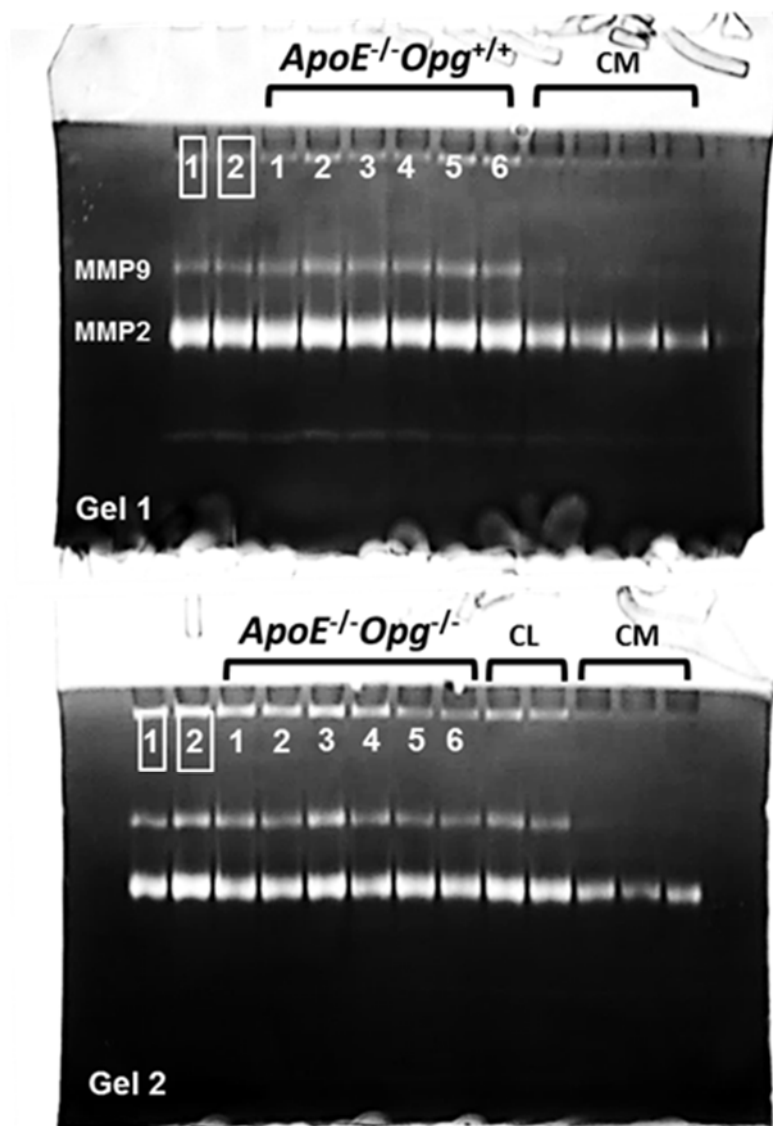

**Figure V: Effect of *Opg* deficiency on aortic levels of MMP2 and MMP9 in AngII-infused *ApoE<sup>-/-</sup>* mice.** Zymographic detection of MMP2 and MMP9 in aortic tissue from *ApoE<sup>-/-</sup>OPG<sup>+/+</sup>* (n=6; Gel 1) and *ApoE<sup>-/-</sup>Opg<sup>-/-</sup>* (n=6; Gel 2) mice following infusion of AngII for seven days. Boxed numerals 1 and 2 are duplicate samples from Gel 1 included on Gel 2 for normalisation of densitometry between gels; CL, cell lysate and conditioned media (CM) from cultured vascular smooth muscle cells as positive control (marker) for MMP2 and 9.

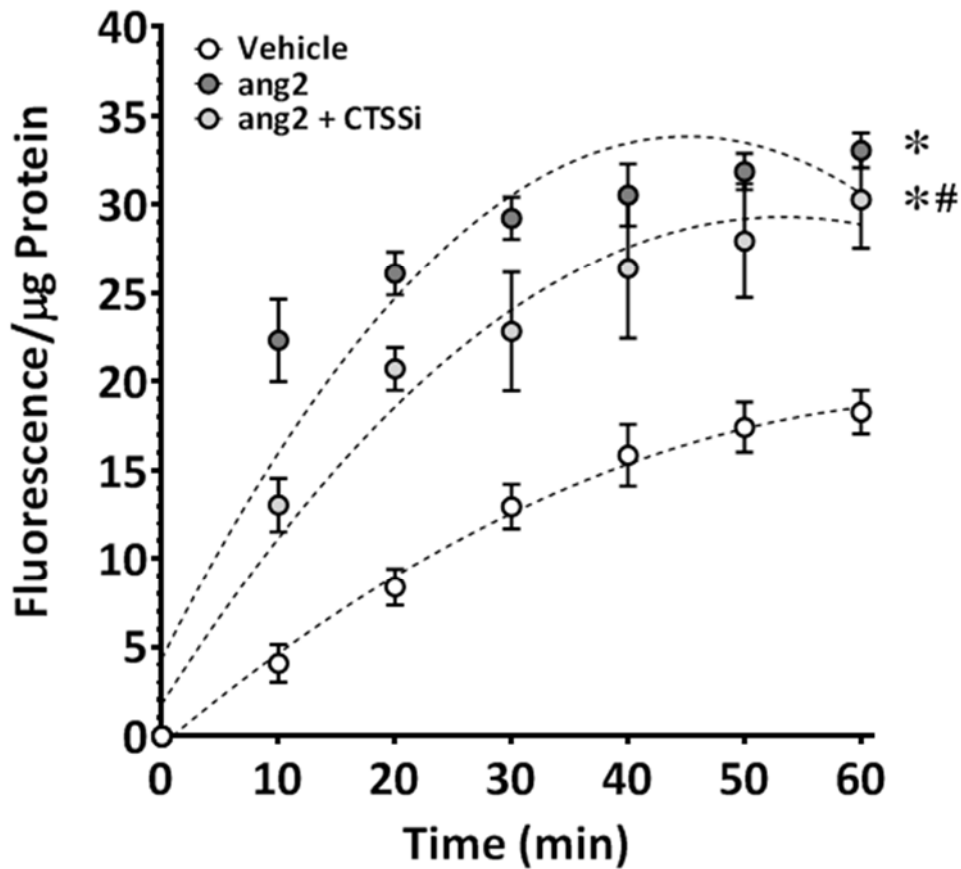

**Figure VI: AngII-induced CTSS-derived elastase activity in AoSMC *in vitro*.** Elastase activity in healthy human AoSMC cultured in the presence and absence of AngII (100 nM) over 36 hours measured using an elastin degradation assay. Addition of a specific CTSS inhibitor Z-FL-COCHO (CTSSi, 20 nM) to AngII-activated AoSMC confirmed CTSS-derived elastase activity induced by AngII. *AngII*, angiotensin II; *CTSS*, cathepsin S; *AoSMC*, aortic smooth muscle cells; Data expressed at each time point ( $n=6$  cultures) as mean and standard deviation CTSS activity (fluorescence/ $\mu\text{g}$  protein); \* $P<0.001$  and # $P=0.042$  calculated by mixed-effects linear regression for difference between vehicle and AngII and AngII+CTSSi, and between AngII and AngII+CTSSi, respectively.

## Supplementary Table

**Table I: Regional aortic diameters in AngII-infused wild-type (*ApoE<sup>+/+</sup>Opg<sup>+/+</sup>*) and *Opg*-null (*ApoE<sup>+/+</sup>Opg<sup>-/-</sup>*) mice**

|             | <i>ApoE<sup>+/+</sup>Opg<sup>+/+</sup></i> | <i>ApoE<sup>+/+</sup>Opg<sup>-/-</sup></i> | <b>P</b> |
|-------------|--------------------------------------------|--------------------------------------------|----------|
| <b>N</b>    | 30                                         | 28                                         |          |
| <b>Arch</b> | 1.48 (1.39-1.67)                           | 1.41 (1.27-1.50)                           | 0.019    |
| <b>TA</b>   | 1.31 (1.22-1.48)                           | 1.23 (1.12-1.33)                           | 0.014    |
| <b>SRA</b>  | 1.37 (1.26-1.69)                           | 1.27 (1.17-1.48)                           | 0.065    |
| <b>IRA</b>  | 0.79 (0.67-0.84)                           | 0.77 (0.68-0.88)                           | 0.562    |

*Opg*, osteoprotegerin; *n*, number; *TA*, thoracic aorta; *SRA*, suprarenal aorta; *IRA*, infra-renal aorta; data presented as median (interquartile range) maximum diameter (mm); *P*, 2-sided *P*-value for comparison between groups by Mann-Whitney *U* test.
